# Supplementary material
Source: Springer Nature journal article supplement (https://www.springermedizin.de/resource/supplementary/12889_2013_6531_MOESM1_ESM.pdf/9498326)
Supplement: MOESM1 [file 9498326]

# Additional file 1

|                                                                                                                              |    |
|------------------------------------------------------------------------------------------------------------------------------|----|
| 1. Questions corresponding to the covariates used in the Cox regression models by study                                      | 2  |
| Smoking status                                                                                                               | 2  |
| Educational level                                                                                                            | 4  |
| Sports frequency                                                                                                             | 5  |
| Healthy eating                                                                                                               | 6  |
| 2. Deaths due to external causes in underweight persons: specified causes of death                                           | 7  |
| 3. Graphical representation of the adjusted hazard ratios for all-cause mortality with the use of different models           | 8  |
| 4. Hazard ratios for cause specific mortality and full adjustment                                                            | 9  |
| 5. Hazard ratios for cause specific mortality and adjustment for age, age <sup>2</sup> , sex, study waves and smoking status | 10 |
| 6. Sensitivity analysis                                                                                                      | 11 |
| 7. BMI category associated with the lowest risk of mortality                                                                 | 12 |
| 8. Interaction with BMI category and age group, smoking status and sex for measured and self-reported BMI data               | 13 |
| 9. Logistic regression: not underweight vs. underweight                                                                      | 15 |

## 1. Questions corresponding to the covariates used in the Cox regression models by study

### Smoking status

The categories of never, former, light and heavy smokers were built with the following questions.

Please note: Current light smokers: <20 cigarettes or 10 cigarillos or 10 pipes or 5 "Stumpfen" or 5 cigars a day. Current heavy smokers: ≥20 cigarettes or 10 cigarillos or 10 pipes or 5 "Stumpfen" or 5 cigars a day. "Stumpfen" is a type of cigar popular in the German-speaking part of Switzerland.

#### MONICA 1 & MONICA 2

| Questions                                           | Possible answers                               |
|-----------------------------------------------------|------------------------------------------------|
| • Do you currently smoke cigarettes?                | -Regularly<br>-No, never<br>-Occasionally      |
| • Average number of cigarettes smoked daily?        |                                                |
| • For non-smokers: Have you ever smoked cigarettes? | -Yes, regularly<br>-No, never<br>-Occasionally |
| • Do you smoke cigars, cigarillos, "Stumpfen"?      | -Yes<br>-No                                    |
| • Average number of cigars smoked weekly?           |                                                |
| • Do you smoke pipes?                               | -Yes<br>-No                                    |
| • Number of grams of pipe tobacco smoked weekly     |                                                |

#### MONICA 3

| Questions                                                        | Possible answers                                                                                      |
|------------------------------------------------------------------|-------------------------------------------------------------------------------------------------------|
| • Do you currently smoke cigarettes?                             | -Regularly<br>-No, never<br>-Occasionally                                                             |
| • Average number of cigarettes smoked daily?                     |                                                                                                       |
| • For the occasional smokers: How many days a week do you smoke? | -At least 1 day a week<br>-2 to 4 days a week<br>-Almost everyday                                     |
| • Did you smoke regularly in the past?                           | -Yes<br>-No                                                                                           |
| • For the non-smokers: Have you ever smoked cigarettes?          | -Yes<br>-No<br>-Occasionally                                                                          |
| • Do you smoke cigars, cigarillos, "Stumpfen"?                   | -Yes, regularly<br>-Yes, occasionally<br>-No, I don't smoke them anymore<br>-No, I don't smoke them   |
| • Average number of cigars smoked weekly?                        |                                                                                                       |
| • Do you smoke pipes?"                                           | -Yes, regularly<br>-Yes, occasionally<br>-No, I don't smoke pipes anymore<br>-No, I don't smoke pipes |
| • Number of grams of pipe tobacco smoked weekly                  |                                                                                                       |

#### NRP 1A

| Questions                          | Possible answers                                                                                                                   |
|------------------------------------|------------------------------------------------------------------------------------------------------------------------------------|
| • Do you smoke?                    | -Yes, I smoke regularly<br>-Yes, but only occasionally<br>-No, but I used to smoke regularly<br>-No, I have never smoked regularly |
| • How much do you currently smoke? | <i>"- Number of cigarettes or cigarillos or pipes per day; number of Stumpfen or cigars per week"</i>                              |

## SOMIPOPS

### Questions

- Do you smoke?
- At the present time, how much do you usually smoke per day, respectively per week?

### Possible answers

-No, I have never smoked  
-No, but I used to smoke regularly  
-Yes, but only occasionally (less than one cigarette a day or cigarillos a day, less than a pipe every two days, less than two cigars a week)  
-Yes, regularly (on average at least one cigarette a day)  
*"Number of cigarettes or cigarillos or pipes per day; number of cigars or "Stumpen" per week:\_\_\_"*

## SHS 92/93

### Questions

- Do you smoke, even if only rarely?
- "What do you smoke?"
- How many cigarettes do you smoke on average per day?
- How many cigars do you smoke on average per day?"
- How many cigarillos do you smoke on average per day?"
- How many pipes do you smoke on average per day?
- Only for non-smokers: Have you ever smoked regularly for more than 6 months?

### Possible answers

-Yes  
-No  
-Cigarettes  
-Cigars  
-Cigarillos  
-Pipes".  
*"\_\_ cigarettes"*  
*"Less than one per day"*  
*"\_\_ cigars"*  
*"Less than one per day"*  
*"\_\_ cigarillos"*  
*"Less than one per day"*  
*"\_\_ pipes"*  
*"Less than one per day"*  
-Yes  
-No

## Educational level

We classified the highest achieved educational level into “Tertiary” (university), “Upper secondary” (beyond 18 years), “secondary” (beyond 16 years) and “mandatory” using the following questions:

### MONICA 1, 2 & 3

| Questions                                                                    | Possible answers                                                                                                                             |
|------------------------------------------------------------------------------|----------------------------------------------------------------------------------------------------------------------------------------------|
| <ul style="list-style-type: none"><li>Level of education achieved?</li></ul> | <ul style="list-style-type: none"><li>-University</li><li>-Beyond 18 years</li><li>-Beyond 16 years</li><li>-Mandatory school only</li></ul> |

### NRP 1A

| Questions                                                                                                                                 | Possible answers                                                                                                                          |
|-------------------------------------------------------------------------------------------------------------------------------------------|-------------------------------------------------------------------------------------------------------------------------------------------|
| <ul style="list-style-type: none"><li>After mandatory school (16 years), did you get an additional education?</li></ul>                   | <ul style="list-style-type: none"><li>-Yes</li><li>-No</li></ul>                                                                          |
| <ul style="list-style-type: none"><li>If yes: How many years of education did you have after mandatory school?</li></ul>                  | <ul style="list-style-type: none"><li>“__ number of years”</li></ul>                                                                      |
| <ul style="list-style-type: none"><li>Beyond mandatory school, did you obtain a certificate, a degree or professional diploma?”</li></ul> | <ul style="list-style-type: none"><li>-Yes</li><li>-No</li></ul>                                                                          |
| <ul style="list-style-type: none"><li>If yes: what diploma did you obtain by the end of your education?”</li></ul>                        | <ul style="list-style-type: none"><li>“Precise description:_____”</li><li>“Choice between 8 answers (only one answer possible)”</li></ul> |

### SOMIPOPS

| Questions                                                                                                                                                                                               | Possible answers                                                                        |
|---------------------------------------------------------------------------------------------------------------------------------------------------------------------------------------------------------|-----------------------------------------------------------------------------------------|
| <ul style="list-style-type: none"><li>Please indicate, for each of the schools listed below, if you attended it. When appropriate, indicate during how many years you attended these schools.</li></ul> | <ul style="list-style-type: none"><li>-“List of 6 categories of schools”</li></ul>      |
| <ul style="list-style-type: none"><li>What is the last certificate you obtained (Please give only one answer)</li></ul>                                                                                 | <ul style="list-style-type: none"><li>-“Choice among 7 categories of diploma”</li></ul> |

### SHS 92/93

| Questions                                                                                                                      | Possible answers                                                                              |
|--------------------------------------------------------------------------------------------------------------------------------|-----------------------------------------------------------------------------------------------|
| <ul style="list-style-type: none"><li>What kind of education or schooling did you complete?” (five possible answers)</li></ul> | <ul style="list-style-type: none"><li>-“List of 12 categories of schools/education”</li></ul> |



## Sports frequency

We categorize sports frequency into “daily”, “several times per week”, “once per week”, “less than once per week” using the answers to the following questions:

### MONICA 1, 2 & 3

| Questions                                                                               | Possible answers                                                                                                                                        |
|-----------------------------------------------------------------------------------------|---------------------------------------------------------------------------------------------------------------------------------------------------------|
| <ul style="list-style-type: none"><li>How often do you do sports on average?”</li></ul> | <ul style="list-style-type: none"><li>-Every day</li><li>-Several times per week</li><li>-Once per week</li><li>-Less frequent</li><li>-Never</li></ul> |

### NRP 1A

| Questions                                                                                                          | Possible answers                                                                                                                                                                       |
|--------------------------------------------------------------------------------------------------------------------|----------------------------------------------------------------------------------------------------------------------------------------------------------------------------------------|
| <ul style="list-style-type: none"><li>How often, on average, do you do sports?(only one possible answer)</li></ul> | <ul style="list-style-type: none"><li>-Every day</li><li>-Several times per week</li><li>-Once per week</li><li>-One to three times per month</li><li>-Rarely</li><li>-Never</li></ul> |

### SOMIPOPS

| Questions                                                                                                                                              | Possible answers                                                                                                                                                                                     |
|--------------------------------------------------------------------------------------------------------------------------------------------------------|------------------------------------------------------------------------------------------------------------------------------------------------------------------------------------------------------|
| <ul style="list-style-type: none"><li>How often and how long on average do you engage in a sporting activity (including “fitness training”)?</li></ul> | <ul style="list-style-type: none"><li>-Never</li><li>-Less than once per month</li><li>-One to three times per month</li><li>-Once per week</li><li>-Several times per week</li><li>-Daily</li></ul> |
| <ul style="list-style-type: none"><li>If at least once per week: how many hours per week?</li></ul>                                                    | <p>“ __ hours”</p>                                                                                                                                                                                   |

### SHS 92/93

| Questions                                                                                                                                                                                                  | Possible answers                                                 |
|------------------------------------------------------------------------------------------------------------------------------------------------------------------------------------------------------------|------------------------------------------------------------------|
| <ul style="list-style-type: none"><li>During your leisure activities, do you have at least once per week a physical activity that makes you sweat? (for example: running, biking, quick walking)</li></ul> | <ul style="list-style-type: none"><li>-Yes</li><li>-No</li></ul> |
| <ul style="list-style-type: none"><li>On average, how many days per week?</li></ul>                                                                                                                        | <p>“ __ days per week (1 to 7 days)”</p>                         |

## Healthy eating

Healthy eating was defined as follows: a) in MONICA, NRP 1A and SOMIPOPS: regularly eating three main meals per day b) in SHS 92/93: eating fruits and vegetables at least once per day and obtained with the answers to the following questions:

### MONICA 1, 2 & 3

| Questions                                                                                                              | Possible answers                                                                                                                                                 |
|------------------------------------------------------------------------------------------------------------------------|------------------------------------------------------------------------------------------------------------------------------------------------------------------|
| <ul style="list-style-type: none"><li>Which meals do you eat during weekdays?<br/>(Several answers possible)</li></ul> | <ul style="list-style-type: none"><li>-Breakfast</li><li>-Mid-morning snack</li><li>-Lunch</li><li>-Mid-afternoon snack</li><li>-Dinner</li><li>-Other</li></ul> |

### NRP 1A

| Questions                                                                                                              | Possible answers                                                                                                                                                                          |
|------------------------------------------------------------------------------------------------------------------------|-------------------------------------------------------------------------------------------------------------------------------------------------------------------------------------------|
| <ul style="list-style-type: none"><li>Which meals do you eat during weekdays?<br/>(Several answers possible)</li></ul> | <ul style="list-style-type: none"><li>-Breakfast</li><li>-Mid-morning snack</li><li>-Lunch</li><li>-Mid-afternoon snack</li><li>-Dinner</li><li>-Late night snack</li><li>-None</li></ul> |

### SOMIPOPS

| Questions                                                                                                                         | Possible answers                                                                                                                                                                                                              |
|-----------------------------------------------------------------------------------------------------------------------------------|-------------------------------------------------------------------------------------------------------------------------------------------------------------------------------------------------------------------------------|
| <ul style="list-style-type: none"><li>Which meals do you eat regularly, i.e. every working day?" (Check all that apply)</li></ul> | <ul style="list-style-type: none"><li>-Breakfast</li><li>-Mid-morning snack</li><li>-Lunch</li><li>-Mid-afternoon snack</li><li>-Dinner</li><li>-Late night snack</li><li>-I don't eat any of these meals regularly</li></ul> |

### SHS 92/93

| Questions                                                                                                                            | Possible answers                                                                                                                                                                                                                                     |
|--------------------------------------------------------------------------------------------------------------------------------------|------------------------------------------------------------------------------------------------------------------------------------------------------------------------------------------------------------------------------------------------------|
| <ul style="list-style-type: none"><li>How many days per week do you usually eat vegetables or salad (other than potatoes)?</li></ul> | <ul style="list-style-type: none"><li>-Never</li><li>-Rarely</li><li>-1 day per week</li><li>-2 days per week</li><li>-3 days per week</li><li>-4 days per week</li><li>-5 days per week</li><li>-6 days per week</li><li>-7 days per week</li></ul> |
| <ul style="list-style-type: none"><li>How many days per week do you eat fruit, on average?</li></ul>                                 | <ul style="list-style-type: none"><li>-1 day per week</li><li>-2 days per week</li><li>-3 days per week</li><li>-4 days per week</li><li>-5 days per week</li><li>-6 days per week</li><li>-7 days per week</li></ul>                                |

MONICA MONitoring of trends and determinants in CARdiovascular disease (3 waves). NRP 1A National Research Program 1A. SOMIPOPS Swiss health survey project SOMIPOPS. SHS 92/93 Swiss Health Survey 1992/93

## 2. Deaths due to external causes in underweight persons: specified causes of death

**Table S1 Specified cause of death of persons with underweight died from external causes (n=20)**

| ICD 8 | ICD 10 | n | Description                                                                                                                                                            |
|-------|--------|---|------------------------------------------------------------------------------------------------------------------------------------------------------------------------|
| 887   |        | 1 | Unspecified fall                                                                                                                                                       |
|       | W130   | 1 | Fall from, out of or through building or structure (home)                                                                                                              |
|       | W190   | 1 | Unspecified fall (home)                                                                                                                                                |
|       | W199   | 3 | Unspecified fall (unspecified place)                                                                                                                                   |
|       | W789   | 1 | Inhalation of gastric contents (unspecified place)                                                                                                                     |
|       | W799   | 1 | Inhalation and ingestion of food causing obstruction of respiratory tract (unspecified place)                                                                          |
|       | X449   | 1 | Accidental poisoning by and exposure to other and unspecified drugs, medicaments and biological substances (unspecified place)                                         |
|       | X619   | 1 | Intentional self-poisoning by and exposure to antiepileptic, sedative-hypnotic, anti-parkinsonism and psychotropic drugs, not elsewhere classified (unspecified place) |
|       | X818   | 1 | Intentional self-harm by jumping or lying before moving object (other specified place)                                                                                 |
| 953   |        | 1 | Suicide and self-inflicted injury by hanging, strangulation and suffocation                                                                                            |
| 954   |        | 1 | Suicide and self-inflicted injury by submersion (drowning)                                                                                                             |
| 805   |        | 1 | Hit by rolling stock                                                                                                                                                   |
| 816   |        | 1 | Non-collision motor vehicle traffic accident due to loss of control                                                                                                    |
| 826   |        | 1 | Pedal cycle accident                                                                                                                                                   |
|       | V051   | 1 | Pedestrian injured in collision with railway train or railway vehicle (traffic accident)                                                                               |
|       | V799   | 1 | Bus occupant injured in unspecified traffic accident                                                                                                                   |
|       | X999   | 1 | Assault by sharp object (unspecified place)                                                                                                                            |
|       | Y099   | 1 | Assault by unspecified means (unspecified place)                                                                                                                       |

Legend: Groups of causes of death

|            |
|------------|
| Fall       |
| Inhalation |
| Poisoning  |
| Suicide    |
| Transport  |
| Violence   |

ICD International Classification of Diseases (ICD 8: 8th revision; ICD 10: 10th revision)

### 3. Graphical representation of the adjusted hazard ratios for all-cause mortality with the use of different models

**Figure S1 Adjusted hazard ratios for all-cause mortality by BMI category**

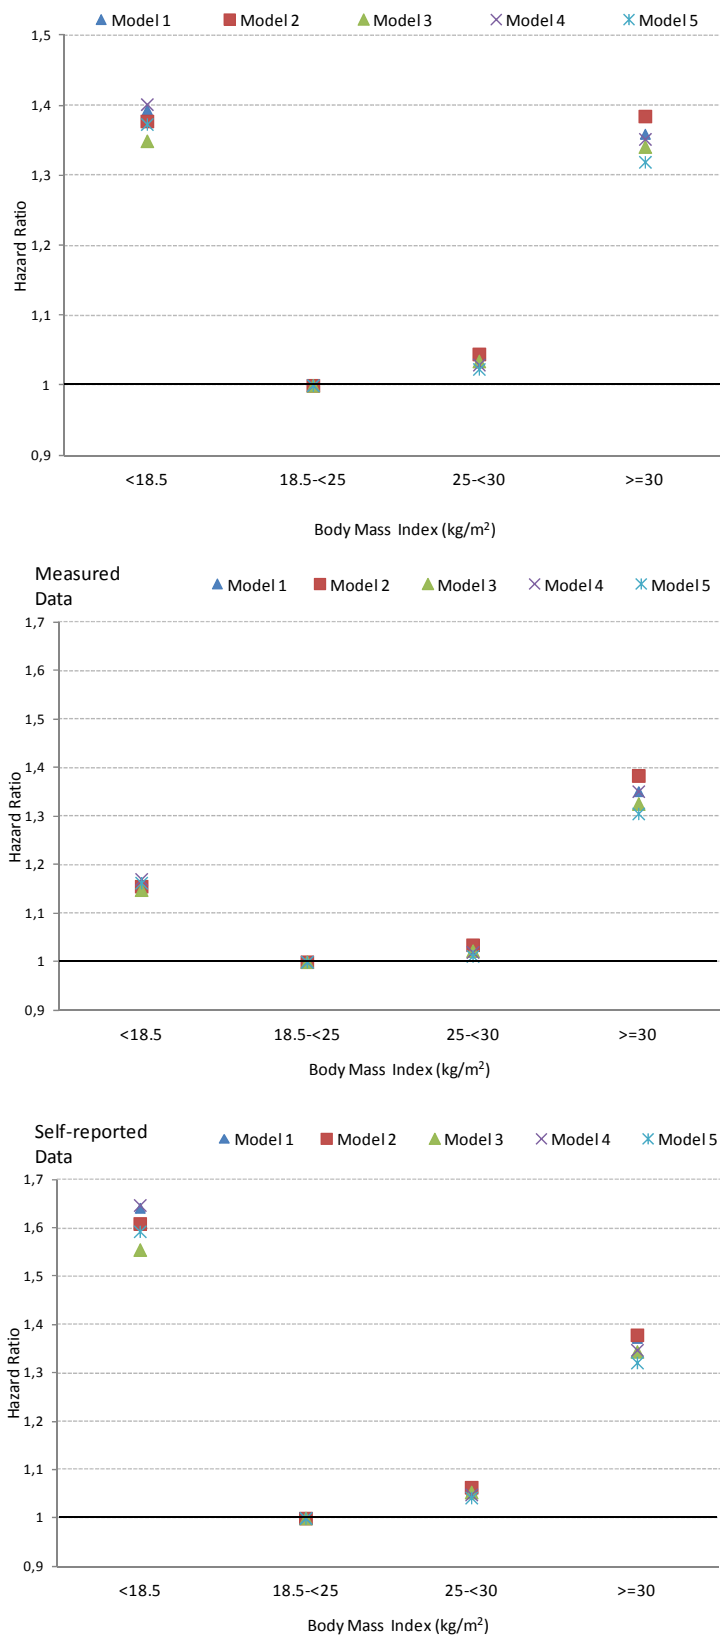

Model 1: adjusted for age, age<sup>2</sup>, sex, and study waves. Model 2: Model 1 + adjusted for smoking status. Model 3: Model 2 + adjusted for lifestyle variables: sports frequency + healthy eating. Model 4: Model 2 + adjusted for educational level. Model 5: Model 3 + Model 4. 30,547 participants (25-74 years at baseline) of the Swiss MONICA, NRP1A, SOMIPOPS and SHS 92/93 Pooled data: results are significant  $P \leq 0.001$  for all the BMI categories, except for overweight category (BMI 25-30 kg/m<sup>2</sup>):  $P$  values varying from 0.142 to 0.441. Measured BMI: Swiss MONICA + NRP 1A: 16,348 participants. Results are significant ( $P < 0.001$ ) for BMI  $\geq 30$  kg/m<sup>2</sup>, not significant for BMI  $< 18.5$  kg/m<sup>2</sup> ( $0.258 \geq P \leq 0.320$ ) and BMI 25-30 kg/m<sup>2</sup> ( $0.368 \geq P \leq 0.755$ ). Self-reported BMI: SOMIPOPS + SHS 92/93: 14,199 participants. Results are significant ( $P \leq 0.001$ ) for BMI  $\geq 30$  kg/m<sup>2</sup>, and BMI  $< 18.5$  kg/m<sup>2</sup>, whereas not significant for BMI 25-30 kg/m<sup>2</sup> ( $0.197 \geq P \leq 0.387$ ).

#### 4. Hazard ratios for cause specific mortality and full adjustment

**Table S2 Hazard ratios for cause specific mortality by BMI category**

|                               | Body mass index category |          |          |                  |          |                  |          |  |
|-------------------------------|--------------------------|----------|----------|------------------|----------|------------------|----------|--|
|                               | <18.5                    |          | 18.5-<25 |                  | 25-<30   |                  | ≥30      |  |
|                               | HR (95%CI)               | <i>P</i> | HR       | HR (95%CI)       | <i>P</i> | HR (95%CI)       | <i>P</i> |  |
| <b>Pooled Data</b>            |                          |          |          |                  |          |                  |          |  |
| CVD                           | 1.18 (0.82-1.70)         | 0.362    | 1        | 1.07 (0.97-1.18) | 0.183    | 1.60 (1.40-1.83) | <0.001   |  |
| Cancer                        | 1.29 (0.95-1.75)         | 0.099    | 1        | 0.99 (0.90-1.09) | 0.847    | 1.15 (1.00-1.32) | 0.057    |  |
| Respiratory diseases          | 1.04 (0.42-2.55)         | 0.931    | 1        | 0.85 (0.66-1.09) | 0.197    | 1.14 (0.81-1.60) | 0.455    |  |
| External causes               | 3.18 (1.96-5.17)         | <0.001   | 1        | 0.88 (0.70-1.12) | 0.304    | 0.95 (0.65-1.38) | 0.786    |  |
| Other                         | 1.35 (0.88-2.07)         | 0.175    | 1        | 1.11 (0.97-1.28) | 0.132    | 1.35 (1.11-1.65) | 0.003    |  |
| <b>Measured BMI Data</b>      |                          |          |          |                  |          |                  |          |  |
| CVD                           | 1.11 (0.66-1.86)         | 0.691    | 1        | 1.10 (0.96-1.25) | 0.155    | 1.65 (1.40-1.94) | <0.001   |  |
| Cancer                        | 0.98 (0.60-1.59)         | 0.939    | 1        | 0.99 (0.87-1.12) | 0.815    | 1.16 (0.98-1.38) | 0.081    |  |
| Respiratory diseases          | 1.01 (0.32-3.23)         | 0.985    | 1        | 0.75 (0.54-1.03) | 0.076    | 0.93 (0.60-1.44) | 0.749    |  |
| External causes               | 2.95 (1.53-5.70)         | 0.001    | 1        | 0.86 (0.64-1.14) | 0.292    | 1.03 (0.67-1.57) | 0.902    |  |
| Other                         | 1.03 (0.53-2.00)         | 0.942    | 1        | 1.08 (0.90-1.29) | 0.432    | 1.25 (0.97-1.60) | 0.083    |  |
| <b>Self-reported BMI Data</b> |                          |          |          |                  |          |                  |          |  |
| CVD                           | 1.24 (0.75-2.06)         | 0.401    | 1        | 1.03 (0.88-1.21) | 0.703    | 1.48 (1.18-1.87) | 0.001    |  |
| Cancer                        | 1.62 (1.09-2.40)         | 0.017    | 1        | 1.00 (0.86-1.17) | 0.978    | 1.11 (0.86-1.44) | 0.410    |  |
| Respiratory diseases          | 0.96 (0.23-3.98)         | 0.956    | 1        | 1.02 (0.70-1.50) | 0.911    | 1.61 (0.94-2.77) | 0.085    |  |
| External causes               | 3.23 (1.57-6.66)         | 0.001    | 1        | 0.96 (0.63-1.47) | 0.865    | 0.73 (0.31-1.69) | 0.458    |  |
| Other                         | 1.78 (1.00-3.14)         | 0.049    | 1        | 1.16 (0.92-1.45) | 0.201    | 1.53 (1.09-2.13) | 0.013    |  |

Adjusted for age, age<sup>2</sup>, study waves, sex, smoking status, educational level, sports frequency and healthy eating (Model 5)

Results based on analyses additionally considering competing risks showed the same pattern

30,547 participants (25-74 years at baseline) of the Swiss MONICA, NRP1A, SOMIPOPS and SHS 92/93

Measured BMI Data: Swiss MONICA + NRP 1A: 16,348 participants

Self-reported BMI Data: SOMIPOPS + SHS 92/93: 14,199 participants

## 5. Hazard ratios for cause specific mortality and adjustment for age, age<sup>2</sup>, sex, study waves and smoking status

**Table S3 Hazard ratios for cause specific mortality by BMI category**

|                               | Body mass index category |          |          |                  |          |                  |          |
|-------------------------------|--------------------------|----------|----------|------------------|----------|------------------|----------|
|                               | <18.5                    |          | 18.5-<25 | 25-<30           |          | ≥30              |          |
|                               | HR (95%CI)               | <i>P</i> | HR       | HR (95%CI)       | <i>P</i> | HR               | <i>P</i> |
| <b>Pooled Data</b>            |                          |          |          |                  |          |                  |          |
| CVD                           | 1.16 (0.82-1.65)         | 0.394    | 1        | 1.10 (1.00-1.21) | 0.051    | 1.60 (1.42-1.83) | <0.001   |
| Cancer                        | 1.26 (0.93-1.70)         | 0.139    | 1        | 1.04 (0.94-1.14) | 0.464    | 1.22 (1.06-1.40) | 0.004    |
| Respiratory diseases          | 1.03 (0.42-2.52)         | 0.945    | 1        | 0.86 (0.68-1.09) | 0.205    | 1.19 (0.86-1.65) | 0.299    |
| External causes               | 3.15 (1.97-5.03)         | <0.001   | 1        | 0.90 (0.72-1.13) | 0.375    | 0.96 (0.67-1.38) | 0.825    |
| Other                         | 1.57 (1.05-2.33)         | 0.026    | 1        | 1.15 (1.00-1.31) | 0.042    | 1.44 (1.19-1.74) | <0.001   |
| <b>Measured BMI Data</b>      |                          |          |          |                  |          |                  |          |
| CVD                           | 1.08 (0.65-1.81)         | 0.764    | 1        | 1.13 (0.99-1.28) | 0.065    | 1.68 (1.44-1.97) | <0.001   |
| Cancer                        | 0.96 (0.59-1.56)         | 0.869    | 1        | 1.04 (0.92-1.17) | 0.549    | 1.26 (1.07-1.49) | 0.006    |
| Respiratory diseases          | 1.08 (0.34-3.45)         | 0.892    | 1        | 0.80 (0.59-1.09) | 0.152    | 0.94 (0.61-1.44) | 0.777    |
| External causes               | 2.81 (1.46-5.40)         | 0.002    | 1        | 0.89 (0.67-1.18) | 0.420    | 1.05 (0.69-1.58) | 0.830    |
| Other                         | 1.27 (0.69-2.32)         | 0.444    | 1        | 1.10 (0.93-1.31) | 0.270    | 1.33 (1.05-1.69) | 0.018    |
| <b>Self-reported BMI Data</b> |                          |          |          |                  |          |                  |          |
| CVD                           | 1.22 (0.76-1.96)         | 0.418    | 1        | 1.08 (0.93-1.25) | 0.342    | 1.49 (1.19-1.86) | 0.001    |
| Cancer                        | 1.55 (1.05-2.30)         | 0.028    | 1        | 1.04 (0.89-1.21) | 0.607    | 1.14 (0.89-1.46) | 0.310    |
| Respiratory diseases          | 0.91 (0.22-3.75)         | 0.900    | 1        | 0.94 (0.65-1.36) | 0.734    | 1.73 (1.05-2.85) | 0.032    |
| External causes               | 3.37 (1.70-6.69)         | <0.001   | 1        | 0.93 (0.62-1.40) | 0.737    | 0.68 (0.29-1.57) | 0.366    |
| Other                         | 1.87 (1.10-3.17)         | 0.021    | 1        | 1.21 (0.98-1.50) | 0.078    | 1.62 (1.17-2.22) | 0.003    |

Adjusted for age, age<sup>2</sup>, study waves, sex and smoking status (Model 2)

Results based on analyses additionally considering competing risks showed the same pattern

31,528 participants (25-74 years at baseline) of the Swiss MONICA, NRP1A, SOMIPOPS and SHS 92/93

Measured BMI Data: Swiss MONICA + NRP 1A: 16,720 participants

Self-reported BMI Data: SOMIPOPS + SHS 92/93: 14,808 participants

## 6. Sensitivity analysis

**Table S4 Hazard ratios (all-cause mortality) without the first years of follow-up and with different follow-up time**

|                                      | Body mass index category |                     |          |               |    |               |                     |          |               |                     |          |
|--------------------------------------|--------------------------|---------------------|----------|---------------|----|---------------|---------------------|----------|---------------|---------------------|----------|
|                                      | <18.5                    |                     |          | 18.5-<25      |    | 25-<30        |                     |          | ≥30           |                     |          |
|                                      | Deaths<br>(n)            | HR<br>(95%CI)       | <i>p</i> | Deaths<br>(n) | HR | Deaths<br>(n) | HR<br>(95%CI)       | <i>p</i> | Deaths<br>(n) | HR<br>(95%CI)       | <i>p</i> |
| <b>Without the first years</b>       |                          |                     |          |               |    |               |                     |          |               |                     |          |
| 1 year                               | 119                      | 1.38<br>(1.14-1.66) | 0.001    | 2504          | 1  | 2172          | 1.03<br>(0.97-1.09) | 0.391    | 794           | 1.32<br>(1.21-1.43) | <0.001   |
| 2 years                              | 115                      | 1.36<br>(1.13-1.65) | 0.001    | 2443          | 1  | 2110          | 1.02<br>(0.96-1.09) | 0.443    | 785           | 1.34<br>(1.23-1.45) | <0.001   |
| 3 years                              | 112                      | 1.38<br>(1.14-1.66) | 0.001    | 2376          | 1  | 2068          | 1.03<br>(0.97-1.09) | 0.343    | 765           | 1.34<br>(1.23-1.46) | <0.001   |
| 4 years                              | 105                      | 1.33<br>(1.09-1.62) | 0.005    | 2302          | 1  | 2007          | 1.04<br>(0.97-1.10) | 0.264    | 746           | 1.36<br>(1.25-1.48) | <0.001   |
| 5 years                              | 100                      | 1.32<br>(1.08-1.61) | 0.007    | 2229          | 1  | 1936          | 1.03<br>(0.97-1.10) | 0.332    | 721           | 1.36<br>(1.25-1.48) | <0.001   |
| <b>With different follow-up time</b> |                          |                     |          |               |    |               |                     |          |               |                     |          |
| 10 years                             | 45                       | 1.58<br>(1.17-2.14) | 0.003    | 804           | 1  | 658           | 0.92<br>(0.83-1.02) | 0.115    | 251           | 1.15<br>(0.99-1.33) | 0.061    |
| 15 years                             | 69                       | 1.36<br>(1.07-1.74) | 0.013    | 1385          | 1  | 1172          | 0.96<br>(0.89-1.04) | 0.360    | 453           | 1.24<br>(1.11-1.38) | <0.001   |
| 20 years                             | 97                       | 1.42<br>(1.16-1.75) | 0.001    | 1884          | 1  | 1621          | 0.98<br>(0.91-1.05) | 0.539    | 634           | 1.28<br>(1.17-1.40) | <0.001   |
| 25 years                             | 111                      | 1.40<br>(1.16-1.70) | 0.001    | 2246          | 1  | 1931          | 1.00<br>(0.94-1.06) | 0.900    | 734           | 1.29<br>(1.18-1.40) | <0.001   |
| 30 years                             | 119                      | 1.37<br>(1.14-1.65) | 0.001    | 2502          | 1  | 2169          | 1.02<br>(0.96-1.08) | 0.515    | 803           | 1.31<br>(1.21-1.43) | <0.001   |

Adjusted for age, age<sup>2</sup>, study waves, sex, smoking status, educational level, sports frequency and healthy eating (Model 5)  
 Participants (25-74 years at baseline) of the Swiss MONICA, NRP1A, SOMIPOPS and SHS 92/93. Maximum follow-up time (32 years) : 30,547 participants. Without: a) first year: 30,413 part.; b) 2 years: 30,185 part.; c) 3 years: 29,950 part.; d) 4 years: 29,719 part.; e) 5 years: 29,477 part.

## 7. BMI category associated with the lowest risk of mortality

**Figure S2 Association of BMI with all-cause mortality (Hazard ratio) using a Cox model analysis with a cubic spline for BMI fitted to the pooled Data (A), measured BMI data (B) and self-reported BMI data (C)**

A

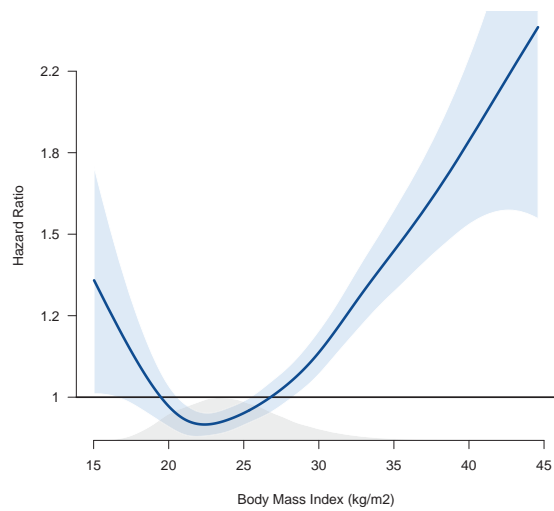

B

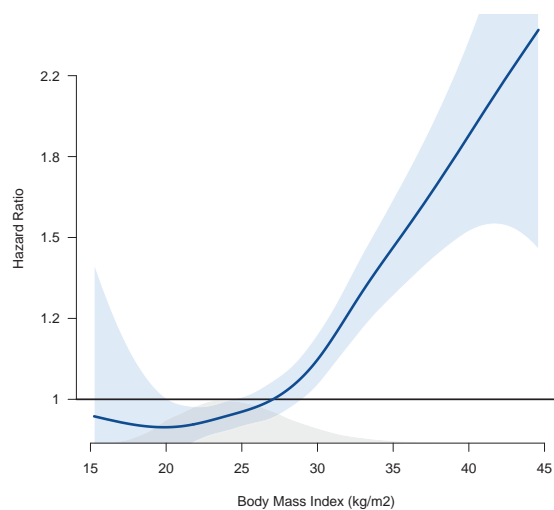

C

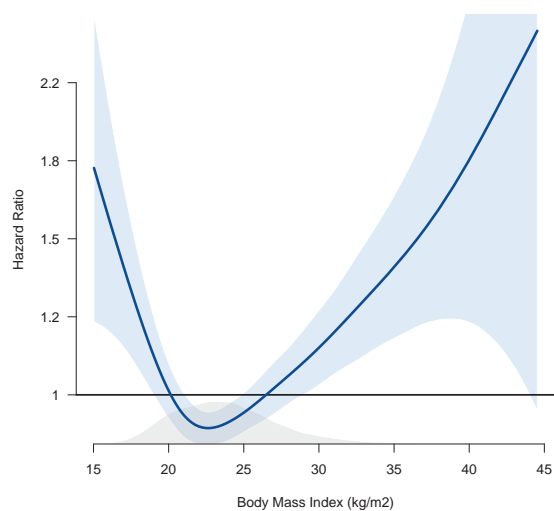

Adjusted for age at baseline, age<sup>2</sup>, sex, study waves, smoking status and exclusion of BMI <15kg/m<sup>2</sup> and >45kg/m<sup>2</sup>  
31,497 participants (25-74 years at baseline) of the Swiss MONICA, NRP 1A, SOMIPOPS and SHS 92/93  
Smooth estimate (blue line), 95 % confidence interval (blue shade) and population density (grey shade)



## 8. Interaction with BMI category and age group, smoking status and sex for measured and self reported BMI data

**Figure S3: Hazard Ratios (all-cause mortality) with 95% confidence interval for interactions with BMI category**

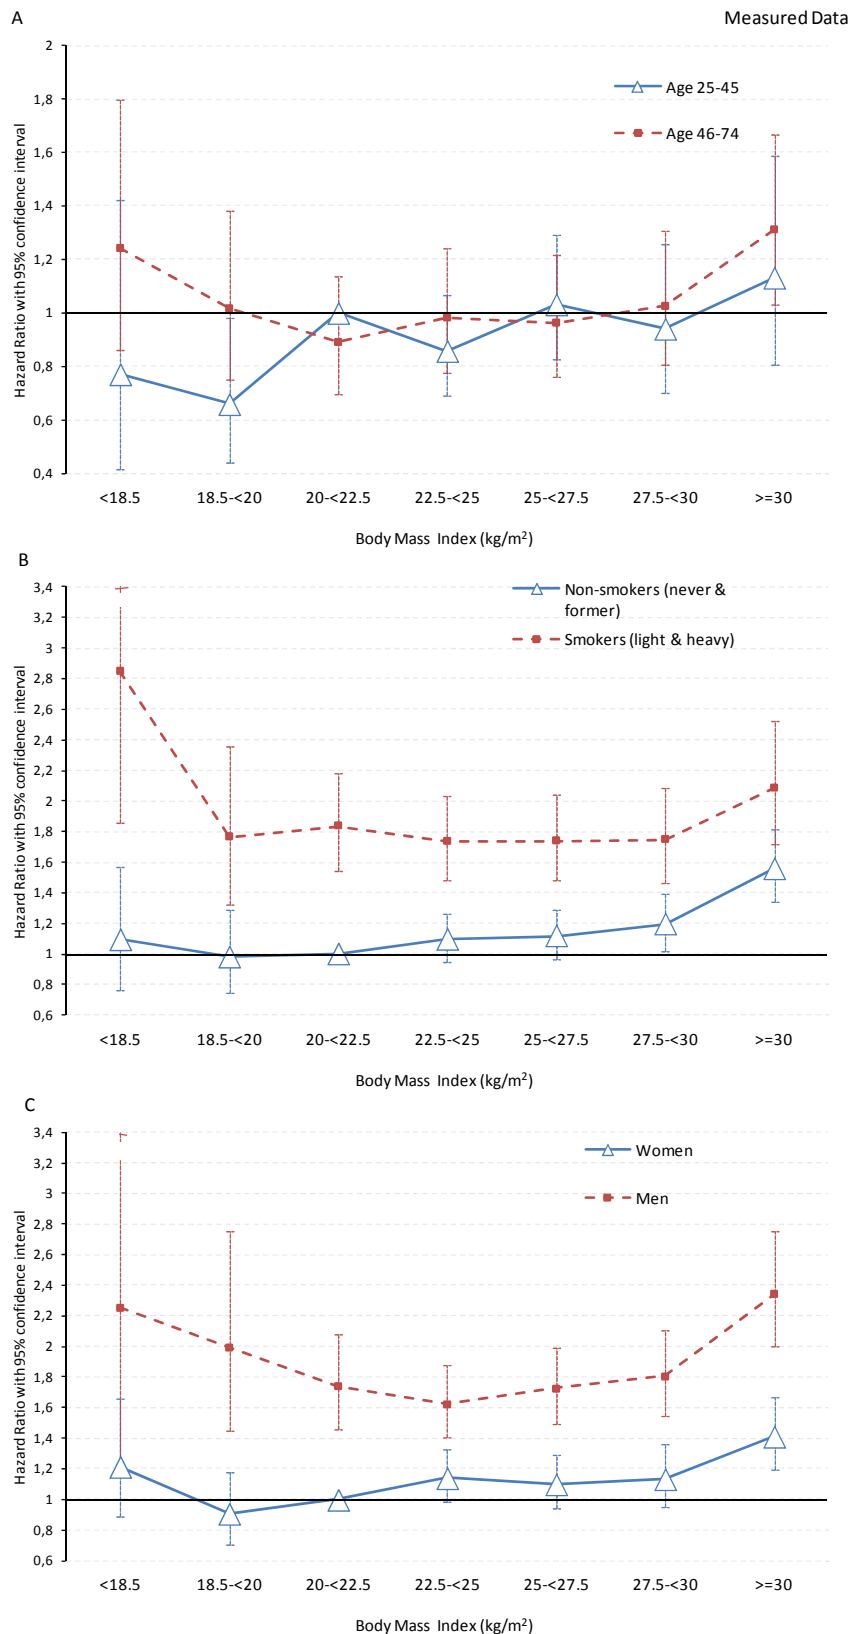

Interaction with age group (A), smoking status (B) and sex (C) and adjustment for age at baseline, age<sup>2</sup>, sex, study waves, smoking status. Reference categories are participants with BMI between 20 and <22.5kg/m<sup>2</sup> and aged between 25 and 45 years (A), non-smokers (never and former) (B) or women (C). 16,720 participants (25-74 years at baseline) of the Swiss MONICA and NRP 1A. Number of deaths in the underweight group: A) aged between 25 and 45 years 11, aged between 46 and 74 years: 45; B) non-smokers: 33, current smokers: 23; C) men: 11, women: 45.

**Figure S4: Hazard Ratios (all-cause mortality) with 95% confidence interval for interactions with BMI category**

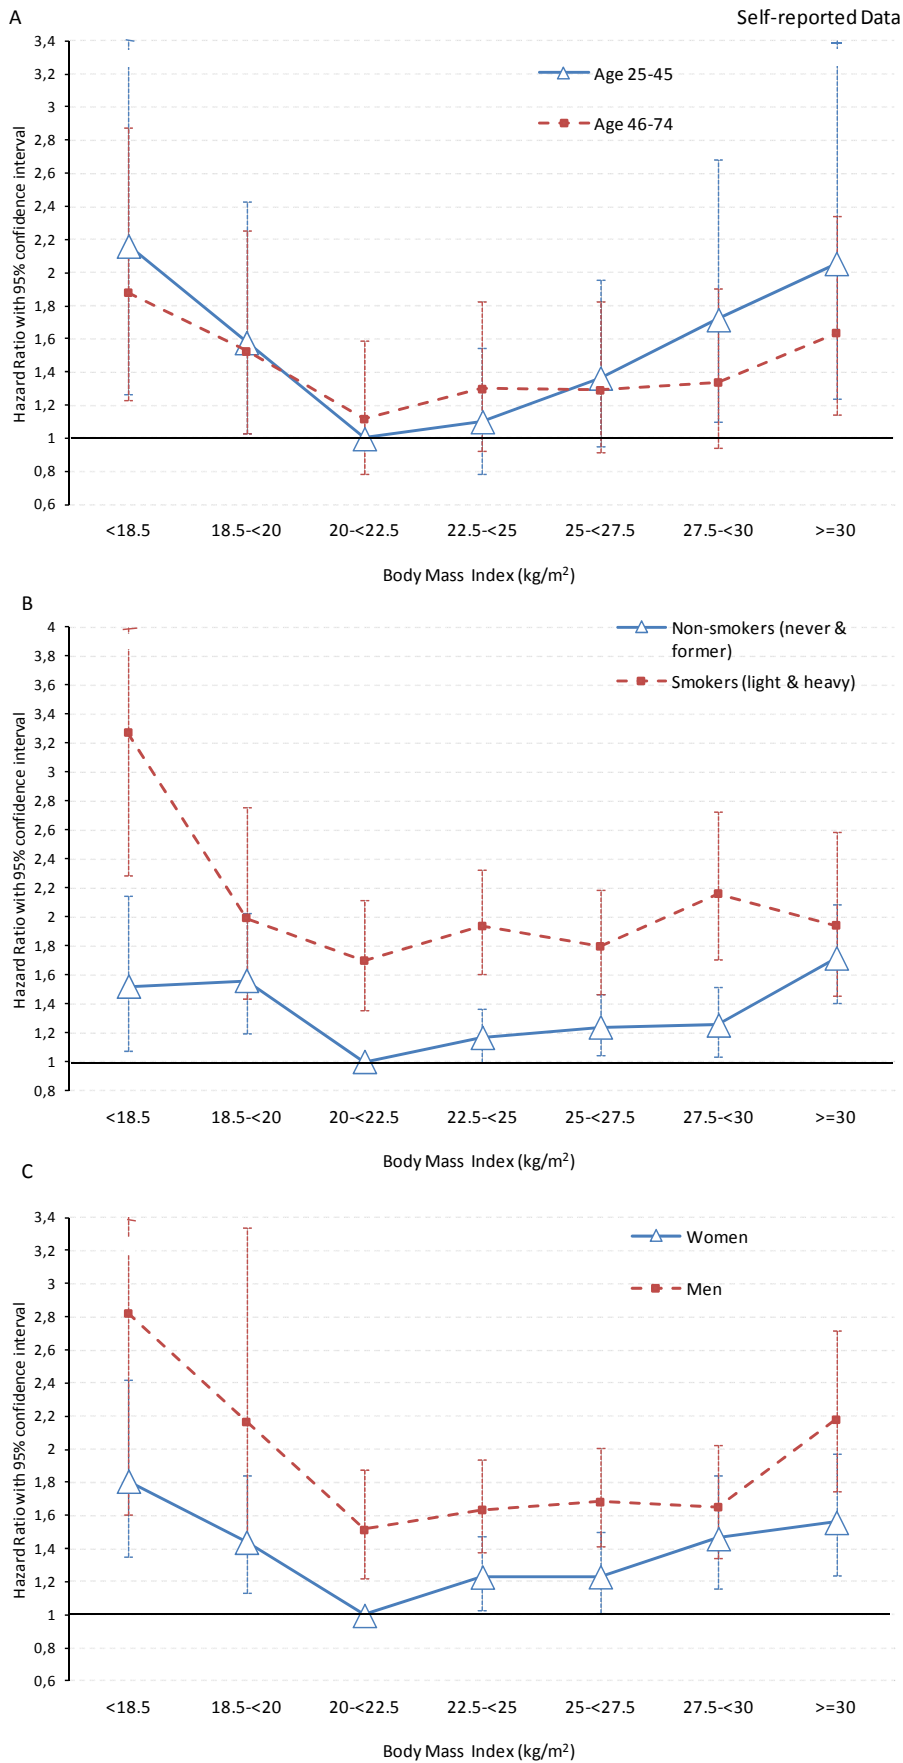

Interaction with age group (A), smoking status (B) and sex (C) and adjustment for age at baseline, age<sup>2</sup>, sex, study waves, smoking status. Reference categories are participants with BMI between 20 and <22.5kg/m<sup>2</sup> and aged between 25 and 45 years (A), non-smokers (never and former) (B) or women (C). 14,808 participants (25-74 years at baseline) of SOMIPOPS and SHS 92/93. Number of deaths in the underweight group: A) aged between 25 and 45 years: 17; aged between 46 and 74 years: 55; B) non-smokers: 37, current smokers: 35; C) men: 13, women: 59.

## 9. Logistic regression: not underweight vs. underweight

**Table S5 Logistic regression model for not underweight vs. underweight**

| Not underweight vs. underweight                        |                     |          |
|--------------------------------------------------------|---------------------|----------|
| Variables                                              | Odds Ratio (95% CI) | <i>P</i> |
| Age                                                    | 0.97 (0.96-0.97)    | <0.001   |
| Interaction between the type of BMI assessment and sex |                     |          |
| Measured men                                           | 1.00                |          |
| Measured women                                         | 8.28 (5.94-11.54)   | <0.001   |
| Self-reported men                                      | 1.32 (0.86-2.01)    | 0.202    |
| Self-reported women                                    | 15.81 (11.45-21.84) | <0.001   |
| Education                                              |                     |          |
| Tertiary                                               | 3.27 (2.44-4.38)    | <0.001   |
| Upper secondary                                        | 2.30 (1.80-2.93)    | <0.001   |
| Secondary                                              | 1.97 (1.63-2.38)    | <0.001   |
| Mandatory                                              | 1.00                |          |
| Sport                                                  |                     |          |
| Daily                                                  | 1.02 (0.77-1.34)    | 0.901    |
| Several times per week                                 | 0.78 (0.65-0.93)    | 0.006    |
| Once per week                                          | 0.81 (0.68-0.97)    | 0.018    |
| Less than once per week                                | 1.00                |          |
| Healthy eating*                                        |                     |          |
| No                                                     | 1.00                |          |
| Yes                                                    | 1.10 (0.94-1.28)    | 0.219    |
| Smoking°                                               |                     |          |
| Never smokers                                          | 1.00                |          |
| Former smokers                                         | 0.73 (0.59-0.91)    | 0.004    |
| Current light smokers                                  | 1.19 (1.00-1.41)    | 0.046    |
| Current heavy smokers                                  | 1.40 (1.14-1.72)    | 0.001    |

° Current light smokers: <20 cigarettes or 10 cigarillos or 10 pipes or 5 "Stumpfen" or 5 cigars a day.

Current heavy smokers: ≥20 cigarettes or 10 cigarillos or 10 pipes or 5 "Stumpfen" or 5 cigars a day.

\* Defined as follows: MONICA, NRP 1A and SOMIPOPS: regularly eating three main meals per day. SHS 92/93: eating fruits and vegetables at least once per day

30,547 participants (25-74 years at baseline) of the Swiss MONICA, NRP1A, SOMIPOPS and SHS 92/93

Based on a multivariable model adjusted for all the variables shown in the table

Underweight: BMI<18.5kg/m<sup>2</sup>. Not underweight BMI≥18.5kg/m<sup>2</sup>
